# Supplementary material for: Coumarin-Based Dual Inhibitors of Human Carbonic Anhydrases and Monoamine Oxidases Featuring Amino Acyl and (Pseudo)-Dipeptidyl Appendages: In Vitro and Computational Studies
Source: MDPI journal article supplement (doi:10.3390/molecules27227884), 2022-11-15
Supplement: s1 [file s1]

# Supplementary material

## Coumarin-Based Dual Inhibitors of Human Carbonic Anhydrases and Monoamine Oxidases Featuring Amino Acyl and (Pseudo)-Dipeptidyl Appendages: In Vitro and Computational Studies

Mariangela Agamennone <sup>1</sup>, Marialuigia Fantacuzzi <sup>1</sup>, Simone Carradori <sup>1,\*</sup>, Anél Petzer <sup>2</sup>,  
Jacobus P. Petzer <sup>2</sup>, Andrea Angeli <sup>3</sup>, Claudiu T. Supuran <sup>3</sup> and Grazia Luisi <sup>1</sup>

<sup>1</sup>*Department of Pharmacy, “G. d’Annunzio” University of Chieti-Pescara, 66100 Chieti, Italy*

<sup>2</sup>*Pharmaceutical Chemistry, School of Pharmacy and Centre of Excellence for Pharmaceutical Sciences,  
North-West University, Potchefstroom 2520, South Africa*

<sup>3</sup>*Neurofarba Department, Section of Pharmaceutical and Nutraceutical Sciences, University of Florence,  
Sesto Fiorentino, 50019 Florence, Italy*

\*Correspondence: [simone.carradori@unich.it](mailto:simone.carradori@unich.it)

### Table of contents

|                  |                                                                                                                                   |     |
|------------------|-----------------------------------------------------------------------------------------------------------------------------------|-----|
| <b>Figure S1</b> | Alignment of 3F8E and 5BNL CA II X-ray complexes, and docked posed of compound <b>19</b> in CA XII and compound <b>6</b> in CA IX | S2  |
| <b>Figure S2</b> | Ligand interaction diagrams                                                                                                       | S3  |
| <b>Figure S3</b> | Ligand RMSF                                                                                                                       | S4  |
| <b>Figure S4</b> | Protein RMSF                                                                                                                      | S4  |
| <b>Figure S5</b> | Timeline representation of ligand-protein contacts                                                                                | S5  |
| <b>Figure S6</b> | Depiction of frequency and type of ligand-protein interaction along with the MD simulation                                        | S5  |
| <b>Figure S7</b> | Alignment of CA XII: <b>19</b> representative binding geometries obtained from clustering the MD frames.                          | S6  |
| <b>Figure S8</b> | Docked poses of ligands <b>6</b> and <b>16</b> in MAO-B binding site                                                              | S7  |
| <b>Figure S9</b> | SiteMap hydrophobic sites in MAO-A and MAO-B binding site                                                                         | S8  |
| <b>Table S1</b>  | Ligand efficiency values calculated from the inhibition data of studied coumarin derivatives against CAs and MAOs.                | S9  |
| <b>Table S2</b>  | Physico-chemical and pharmacokinetic properties of studied ligands calculated by QuikProp.                                        | S10 |

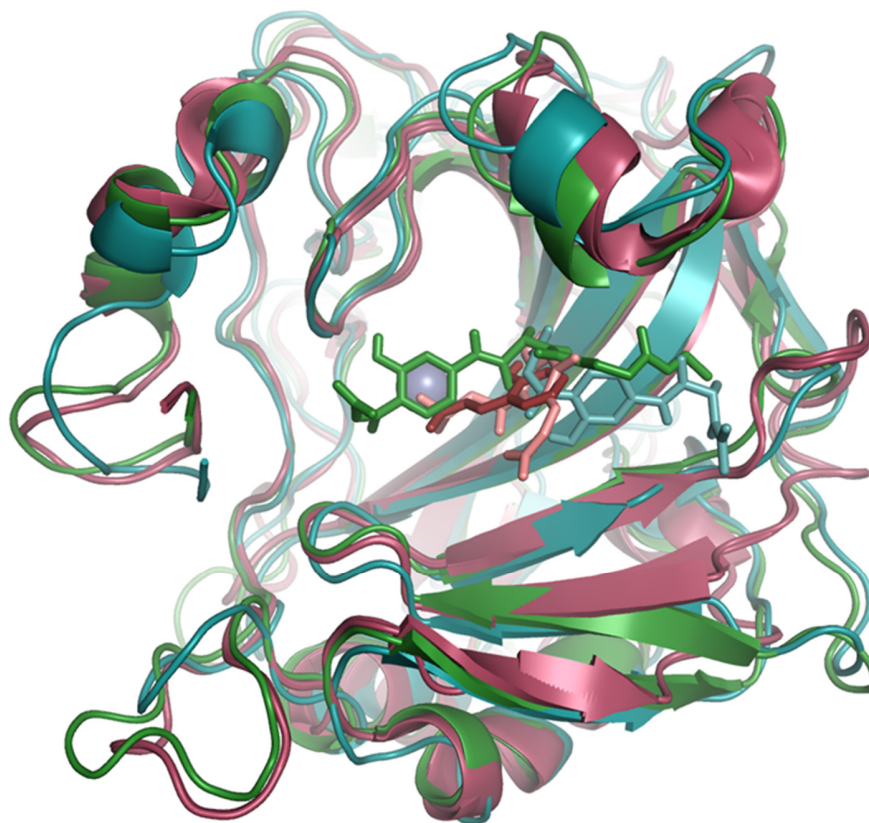

**Figure S1.** Superposition between 3F8E (salmon) and 5BNL (raspberry) CA II X-ray complexes, and docked poses of compound **6** in the CA IX (cyan) and compound **19** in the CA XII (dark green) proteins. Ligands occupy almost the same region of the enzymes' active site.

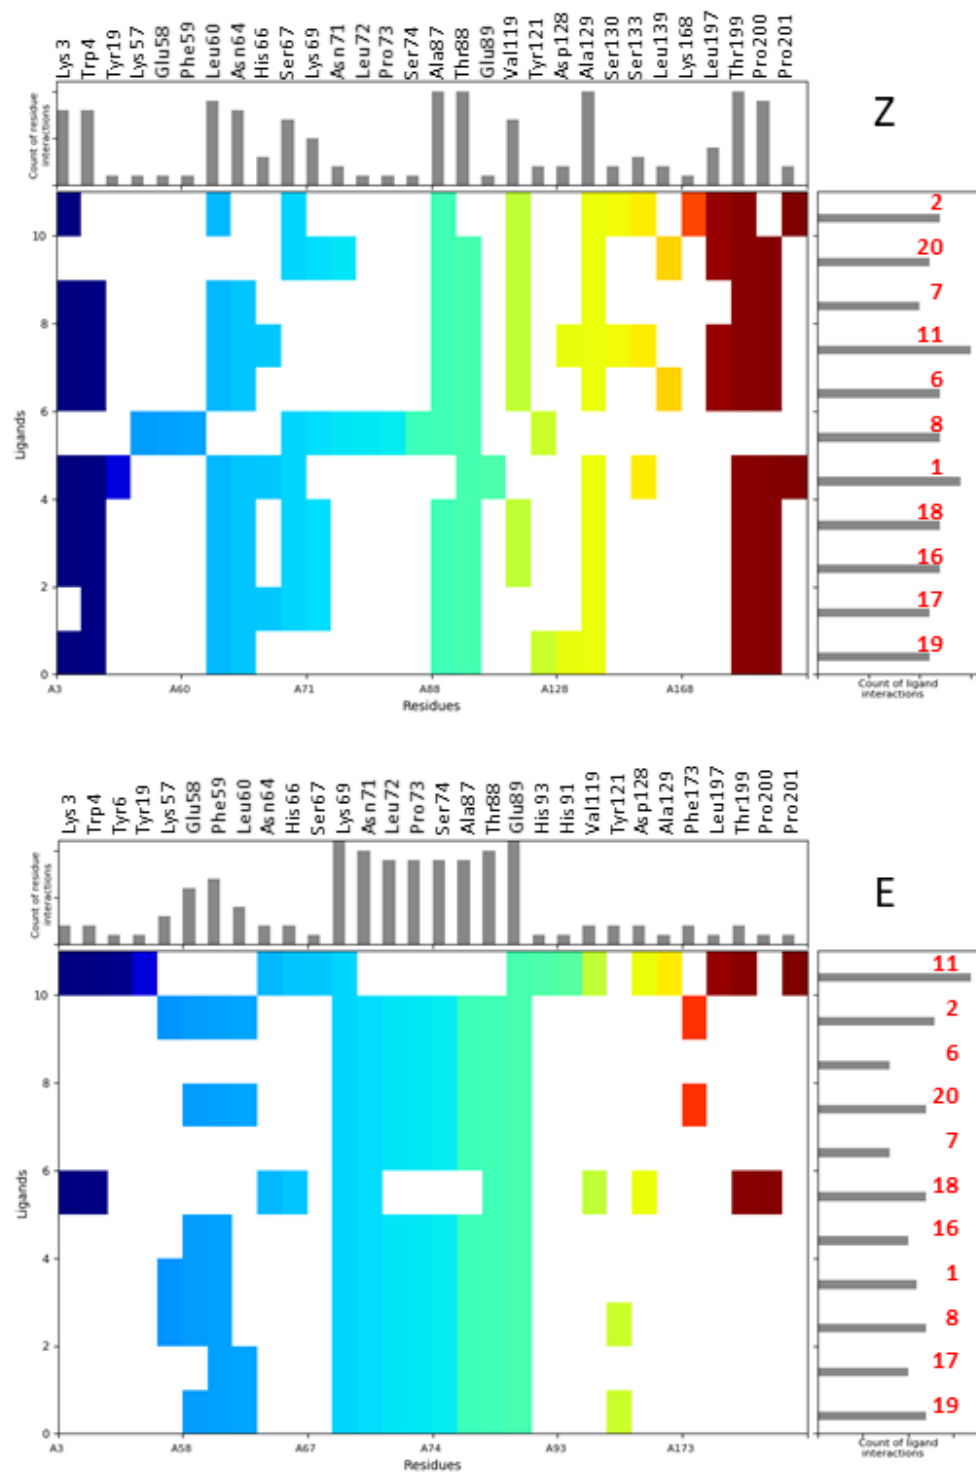

**Figure S2.** Ligand interaction diagrams for all *Z* and *E* hydrolyzed forms of all studied ligands in the CA XII. The most conserved contacts are shared among all inhibitors.

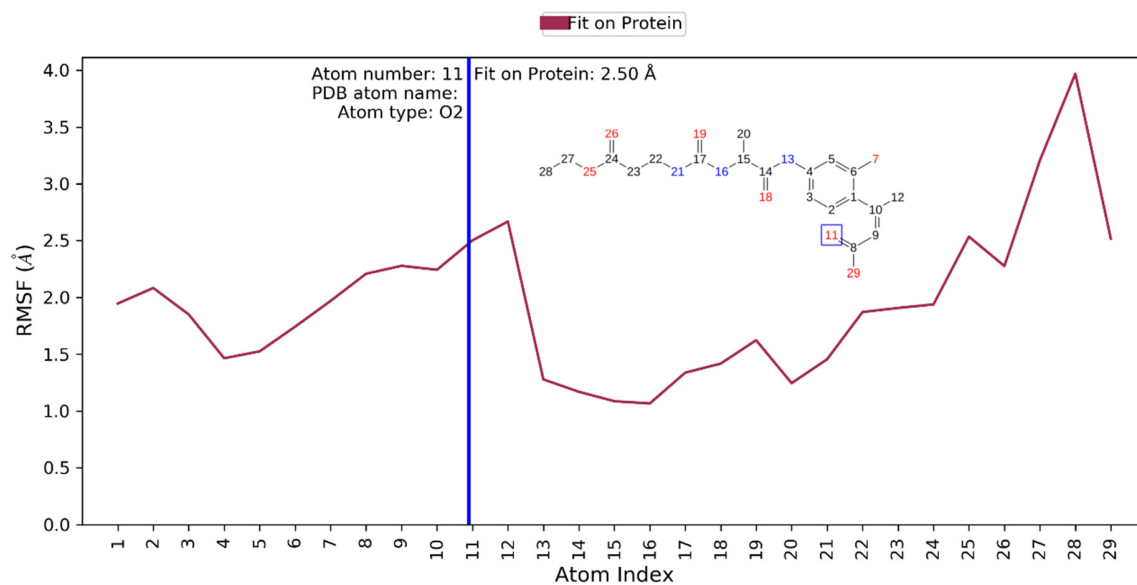

**Figure S3.** Ligand 19 Root Mean Square Fluctuation (RMSF) calculated in the MD simulation.

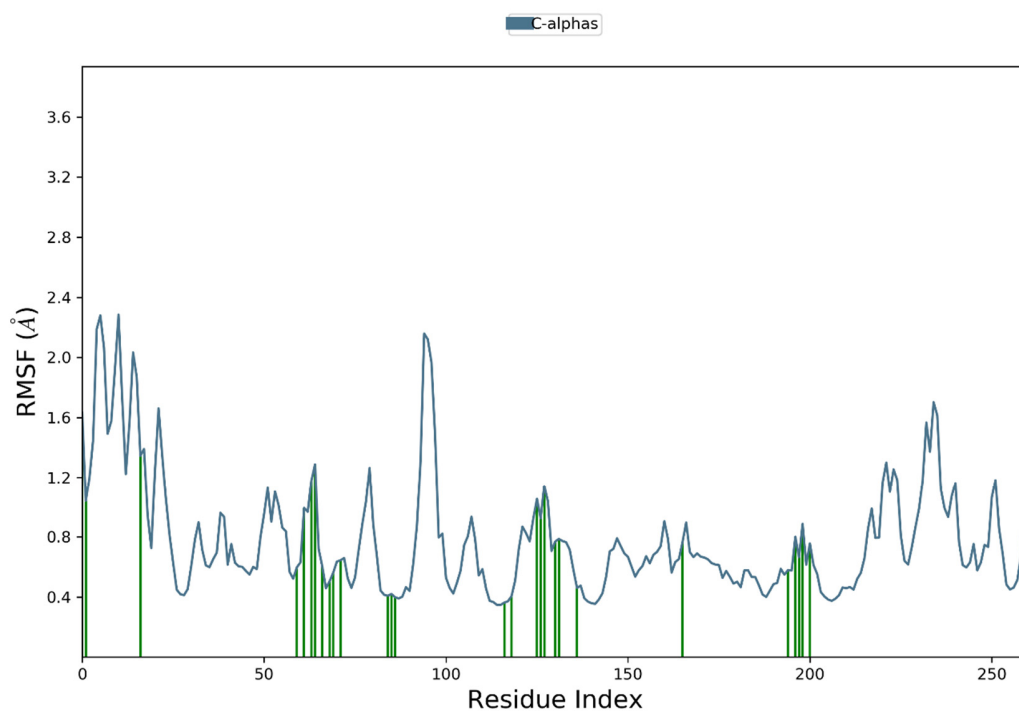

**Figure S4.** Protein RMSF; green lines indicate residues involved in ligand 19 interactions.

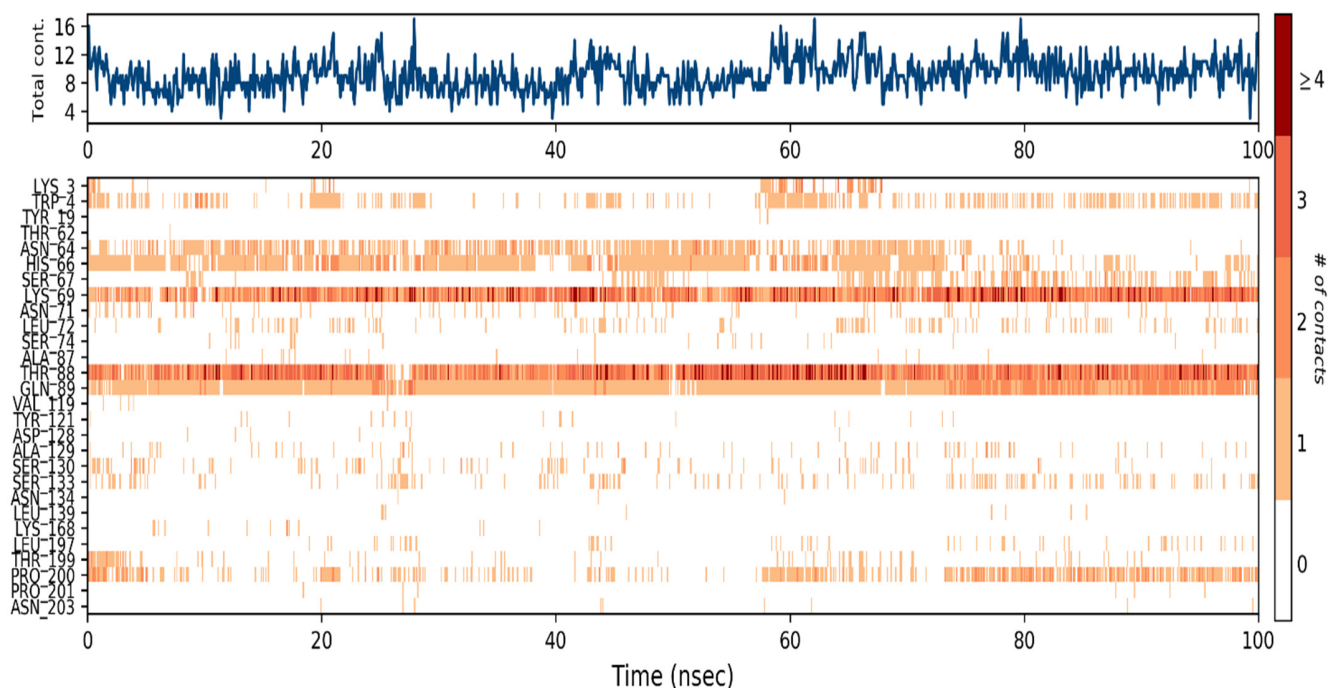

**Figure S5.** Timeline representation of ligand-protein contacts during MD simulation.

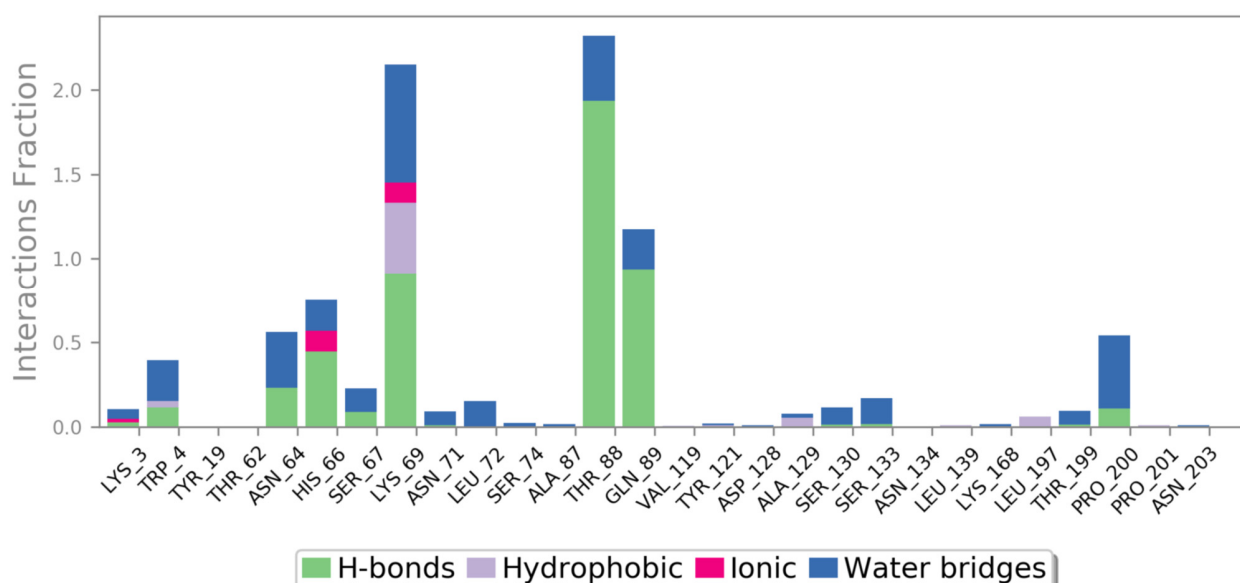

**Figure S6.** Depiction of frequency and type of ligand-protein interaction along with the MD simulation. Ligand 19 forms mainly polar contacts with the protein.

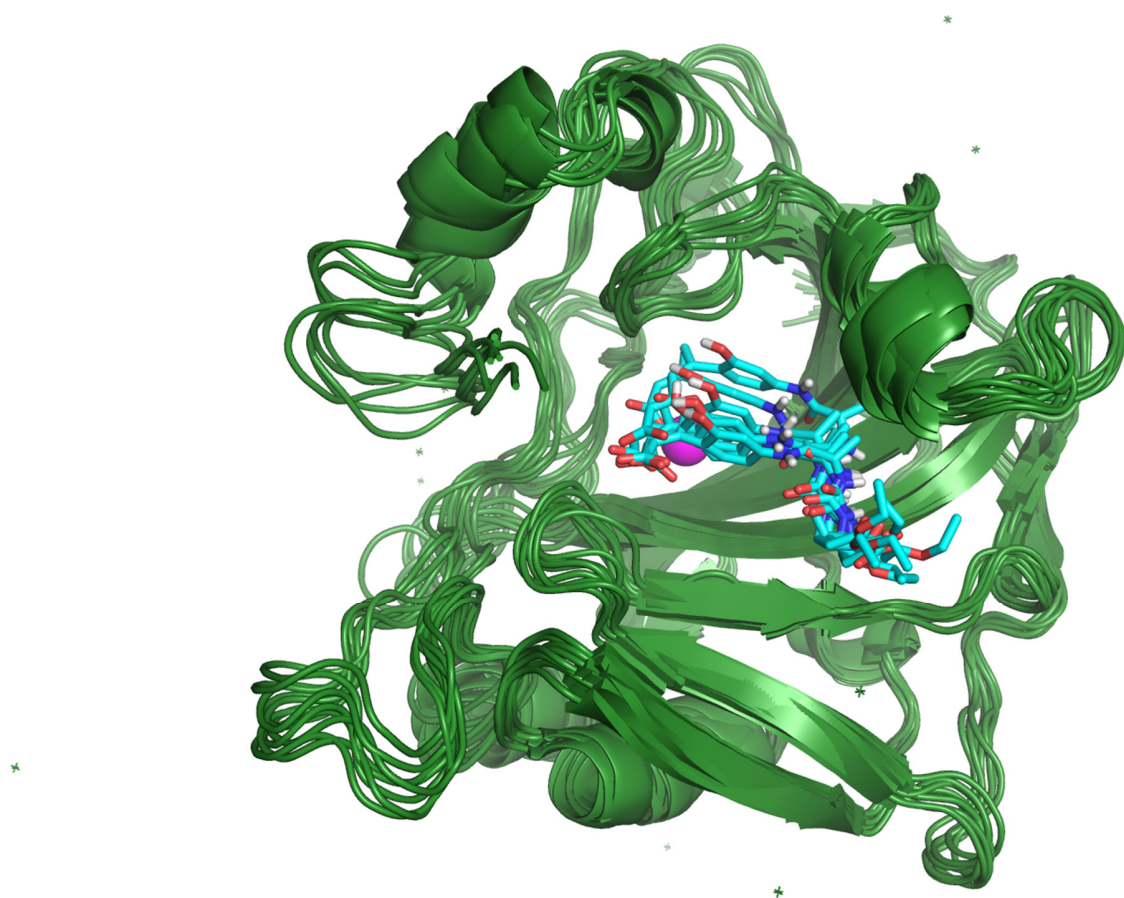

**Figure S7.** Alignment of CA XII:19 representative binding geometries obtained from clustering the MD frames.

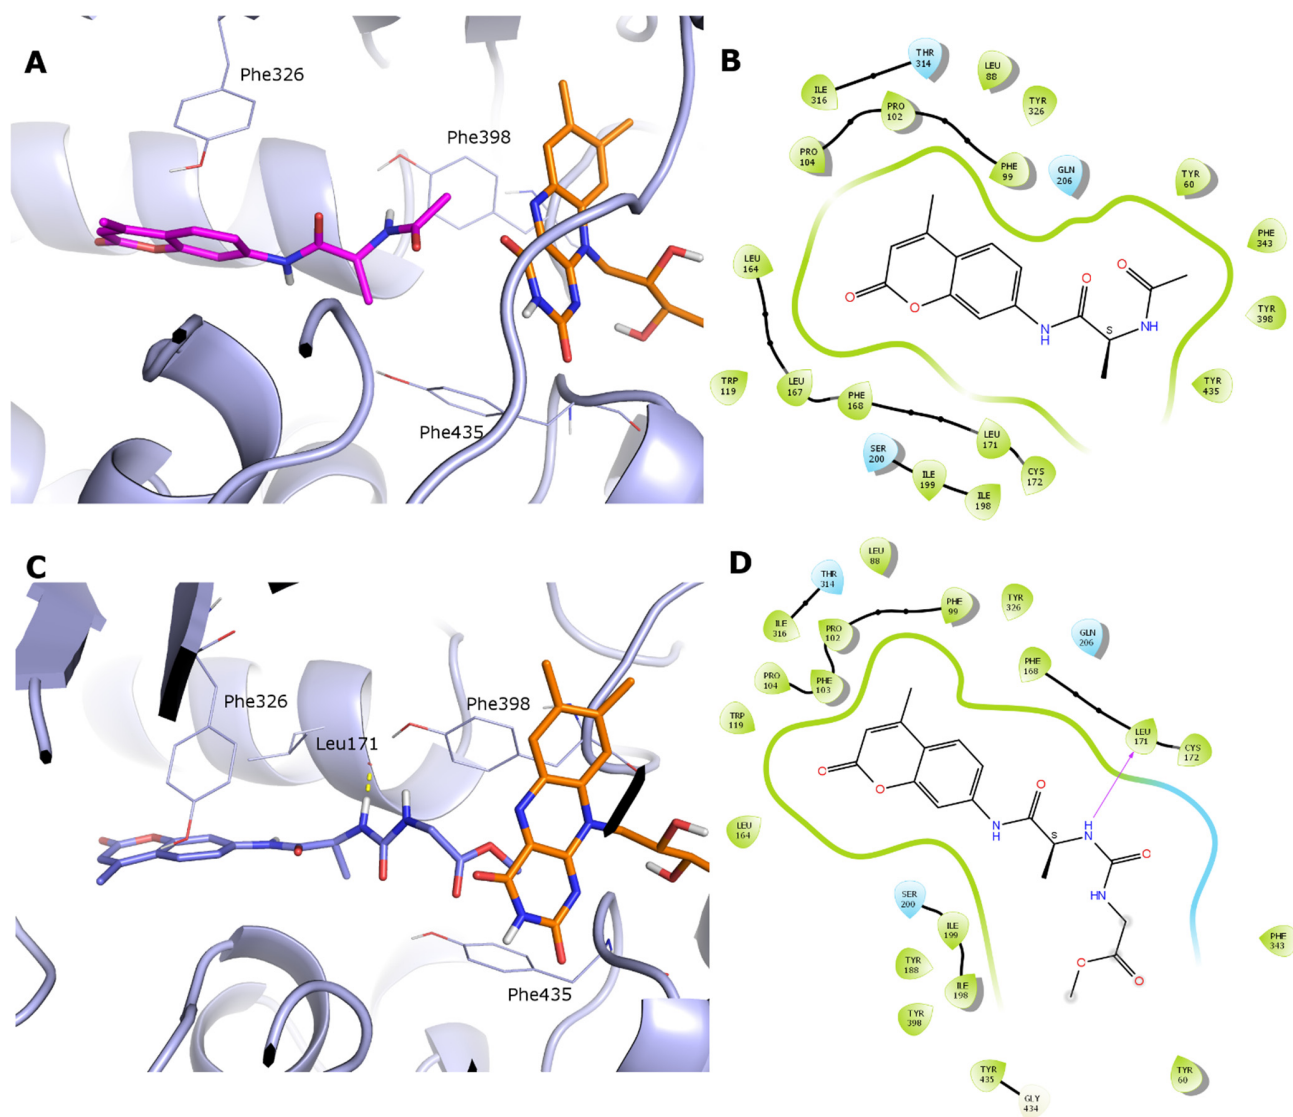

**Figure S8.** Panels A and C show the catalytic site of MAO-B in complex with compounds **6** and **16**, respectively. Panels B and D show the corresponding 2D interaction diagrams.



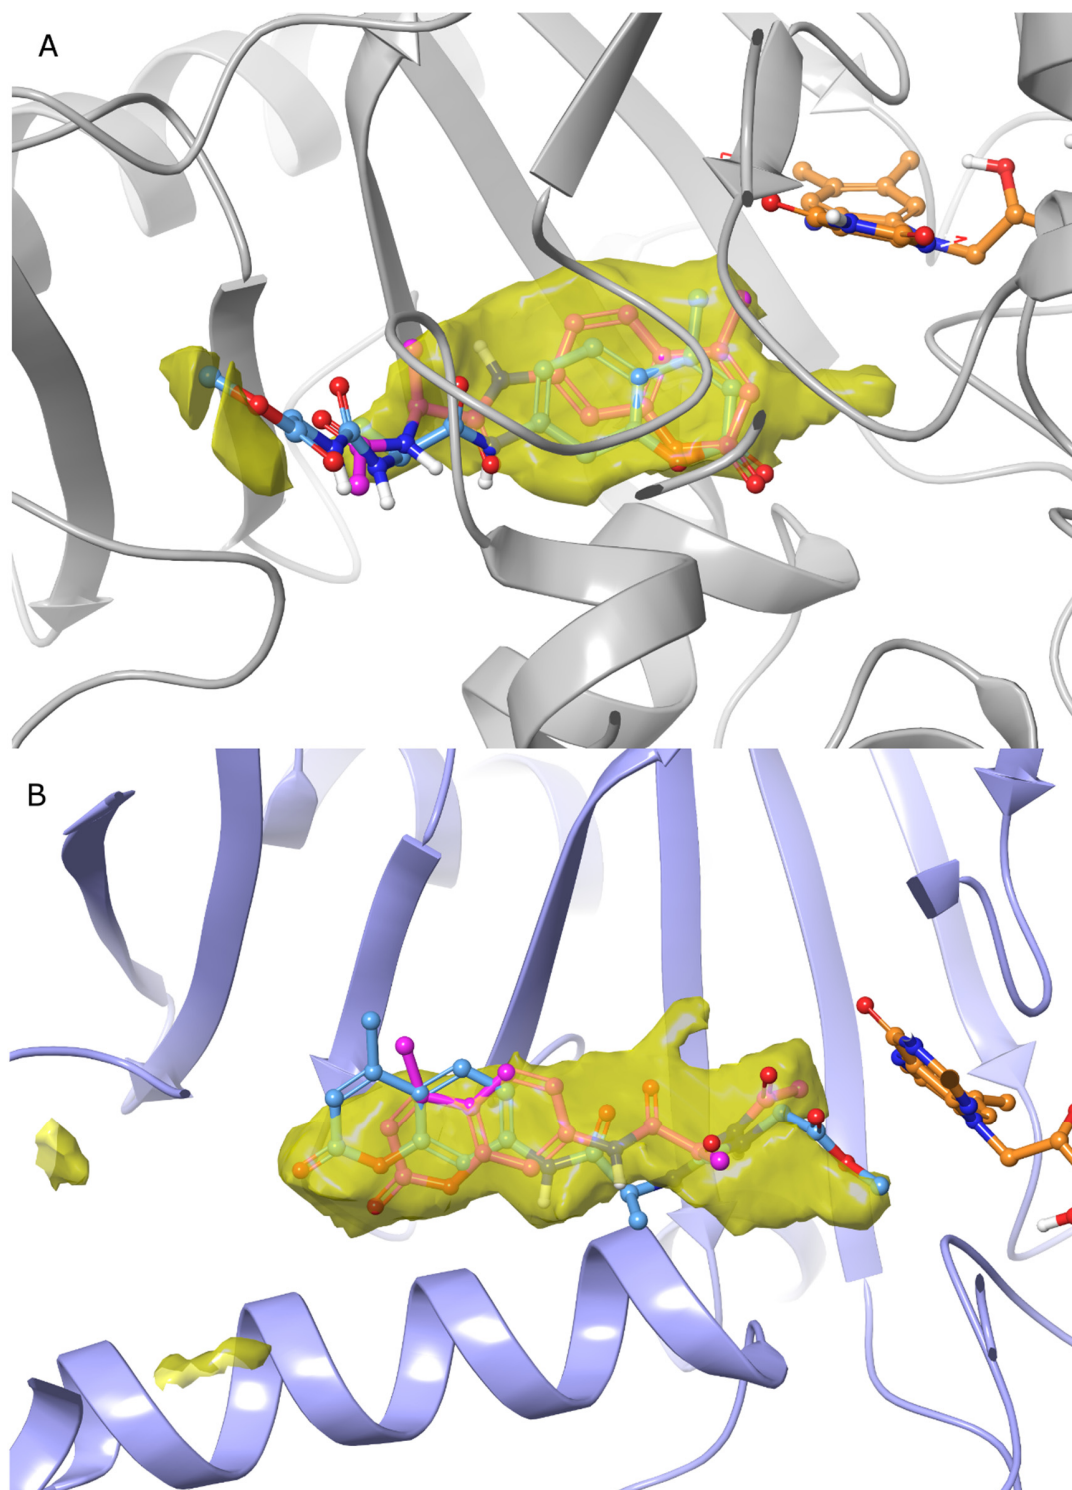

**Figure S9.** SiteMap calculated hydrophobic interaction region (yellow transparent surface) in the MAO-A (panel A) and MAO-B (panel B) binding site. The docked poses of ligands **6** and **16** in both enzymes are reported.



**Table S1.** Ligand efficiency values calculated from the inhibition data of studied coumarin derivatives against CAs and MAOs.

| Compounds                | hCA I               | hCA II              | hCA IX              | hCA XII             | SI      | LE CA IX | LE CA XII | MAO-A                 | MAO-B                 | SI          | LE MAO-A | LE MAO-B |
|--------------------------|---------------------|---------------------|---------------------|---------------------|---------|----------|-----------|-----------------------|-----------------------|-------------|----------|----------|
|                          | K <sub>i</sub> (nM) | K <sub>i</sub> (nM) | K <sub>i</sub> (nM) | K <sub>i</sub> (nM) | hCA XII |          |           | IC <sub>50</sub> (μM) | IC <sub>50</sub> (μM) | MAO-B/MAO-A |          |          |
| Ac-Ala-MAC (1)           | >10000              | >10000              | 23,4                | 30,5                | 0,77    | 0,50     | 0,49      | 1,9195                | > 100                 | >52,3       | 0,37     | n/a      |
| Z-Ala-MAC (2)            | >10000              | >10000              | 30,5                | 7,7                 | 3,96    | 0,37     | 0,40      | 9,3095                | > 100                 | >10,75      | 0,25     | n/a      |
| Ac-Ala-MMAC (3)          | >10000              | >10000              | 29,4                | 46,8                | 0,63    | 0,45     | 0,44      | 11,97                 | 45,585                | 3,8         | 0,29     | 0,26     |
| Z-Ile-MMAC (4)           | >10000              | >10000              | 78,7                | 41,5                | 1,9     | 0,30     | 0,31      | 46,975                | > 100                 | >2,13       | 0,18     | n/a      |
| Fmoc-Ala-MAC (5)         | >10000              | >10000              | 91                  | 37,2                | 2,45    | 0,28     | 0,29      | 54,8                  | > 100                 | >1,82       | 0,17     | n/a      |
| Z-Ala-tLeu-MMAC (6)      | >10000              | >10000              | 171,5               | 336,3               | 0,51    | 0,24     | 0,23      | 41,25                 | 79,46                 | 1,93        | 0,16     | 0,15     |
| MeO-Gly-CO-Ala-MAC (7)   | >10000              | >10000              | 183,3               | 38,2                | 4,79    | 0,36     | 0,39      | 5,9095                | > 100                 | >16,95      | 0,28     | n/a      |
| MeO-Ala-CO-Ala-MAC (8)   | >10000              | >10000              | 163,3               | 9,6                 | 17,01   | 0,34     | 0,41      | 69,56                 | 58,645                | 0,84        | 0,21     | 0,22     |
| MeO-Phe-CO-Ala-MAC (9)   |                     |                     | 96,3                | 40                  |         | 0,29     | 0,31      | 21,765                | 77,965                | 3,58        | 0,19     | 0,17     |
| MeO-Ala-CO-Ala-MMAC (10) | >10000              | >10000              | 27                  | 54,7                | 0,49    | 0,36     | 0,34      | > 100                 | 75,32                 | <0,75       | n/a      | 0,20     |
| EtO-βAla-CO-Ala-MAC (11) | >10000              | >10000              | 260,5               | 9,5                 | 27,42   | 0,32     | 0,39      | > 100                 | > 100                 | -           | n/a      | n/a      |

**Table S2.** Physico-chemical and pharmacokinetic properties of studied ligands calculated by QuikProp.

| ID | #stars | #rotor | CNS | mol_MW  | donorHB | accptHB | QPlogPo/w | QPlogS | QPlogHERG |
|----|--------|--------|-----|---------|---------|---------|-----------|--------|-----------|
| 1  | 1      | 3      | -2  | 288.302 | 1.250   | 6.750   | 0.909     | -2.579 | -3.487    |
| 2  | 1      | 5      | -2  | 318.329 | 1.250   | 8.450   | 0.749     | -2.489 | -3.803    |
| 2  | 1      | 5      | -2  | 380.399 | 1.250   | 6.750   | 3.356     | -5.187 | -5.715    |
| 4  | 1      | 9      | -2  | 452.506 | 1.250   | 8.450   | 3.753     | -4.976 | -5.491    |
| 5  | 0      | 5      | -2  | 468.508 | 1.250   | 6.750   | 4.244     | -5.520 | -5.399    |
| 6  | 1      | 10     | -2  | 523.585 | 1.500   | 10.200  | 3.190     | -4.270 | -4.153    |
| 7  | 1      | 5      | -2  | 361.354 | 1.500   | 7.500   | 1.332     | -4.022 | -4.050    |
| 8  | 1      | 5      | -2  | 375.380 | 1.500   | 7.500   | 1.515     | -4.132 | -3.726    |
| 9  | 1      | 5      | -2  | 361.354 | 1.500   | 7.500   | 1.331     | -4.020 | -4.048    |
| 10 | 1      | 7      | -2  | 405.407 | 1.500   | 9.200   | 1.355     | -4.051 | -4.029    |
| 11 | 0      | 7      | -2  | 389.407 | 1.250   | 7.250   | 1.725     | -2.675 | -2.865    |

  

| ID | QPPCaco | QPlogBB | QPPMD<br>CK | #metab | QPlogKhsa | Percent<br>Human<br>Oral<br>Absorption | PSA     | Rule<br>Of<br>Five |
|----|---------|---------|-------------|--------|-----------|----------------------------------------|---------|--------------------|
| 1  | 192.179 | -1.084  | 158.515     | 2      | -0.523    | 73.141                                 | 111.787 | 0                  |
| 2  | 192.286 | -1.276  | 158.615     | 3      | -0.717    | 72.208                                 | 119.403 | 0                  |
| 2  | 285.776 | -1.319  | 127.755     | 3      | 0.420     | 90.556                                 | 119.943 | 0                  |
| 4  | 467.279 | -1.353  | 217.371     | 4      | 0.341     | 96.698                                 | 123.730 | 0                  |
| 5  | 333.991 | -1.145  | 151.204     | 3      | 0.767     | 96.964                                 | 119.773 | 0                  |
| 6  | 162.735 | -1.672  | 123.059     | 5      | 0.051     | 72.248                                 | 153.820 | 1                  |
| 7  | 58.228  | -1.985  | 37.688      | 3      | -0.270    | 66.337                                 | 158.219 | 0                  |
| 8  | 81.188  | -1.796  | 47.340      | 3      | -0.209    | 69.994                                 | 152.593 | 0                  |
| 9  | 58.240  | -1.984  | 37.692      | 3      | -0.270    | 66.333                                 | 158.215 | 0                  |
| 10 | 80.980  | -2.017  | 47.205      | 4      | -0.404    | 69.037                                 | 160.233 | 0                  |
| 11 | 68.851  | -1.626  | 57.064      | 3      | -0.211    | 69.942                                 | 153.899 | 0                  |

#stars: Number of property or descriptor values that fall outside the 95% range of similar values for known drugs; rotor: number of rotatable bonds; CNS: Predicted central nervous system activity on a -2 (inactive) to +2 (active) scale; QPlogS: Predicted aqueous solubility, log S. S in mol dm<sup>-3</sup> is the concentration of the solute in a saturated solution (-6.5/+0.5); QPlogHERG: Predicted IC<sub>50</sub> value for blockage of HERG K<sup>+</sup> channels (concern below -5); QPPCaco: Predicted apparent Caco-2 cell permeability in nm/sec. Caco-2 cells are a model for the gut-blood barrier (<25 poor, >500 great); QPlogBB: Predicted brain/blood partition coefficient (-3.0/+1.2); QPPMDCK: Predicted apparent MDCK cell permeability in nm/sec. MDCK cells are considered to be a good mimic for the blood-brain barrier (<25 poor, >500 great); #metab: Number of likely metabolic reactions; QPlogKhsa: Prediction of binding to human serum albumin (-1.5/+1.5); PercentHumanOralAbsorption: Predicted human oral absorption on 0 to 100% scale; PSA: Van der Waals surface area of polar nitrogen and oxygen atoms and carbonyl carbon atoms (7-200); RuleOfFive: Number of violations of Lipinski's rule of five.
